# Supplementary material
Source: publisher figshare collection journal article supplement (https://karger.figshare.com/ndownloader/files/8742736)
Supplement: Supplementary file 1 [file 8742736]

## Online supplementary materials

**Online supplementary table 1: Health service utilization of both MBCT-I and PEEC groups in 8 months (n = 216)**

| Health Care Use                                                                                                               | MBCT-I     | PEEC       | P value                  |
|-------------------------------------------------------------------------------------------------------------------------------|------------|------------|--------------------------|
| <b>Participants who visited to primary care and secondary care doctors (both private and public) in the last month (n, %)</b> |            |            |                          |
| Baseline                                                                                                                      | 35 (31.5%) | 30 (28.6%) | 0.635                    |
| 2 month                                                                                                                       | 18 (16.2%) | 30 (28.6%) | <b>0.029<sup>a</sup></b> |
| 5 Month                                                                                                                       | 18 (16.2%) | 13 (12.4%) | 0.422                    |
| 8 Month                                                                                                                       | 19 (17.1%) | 24 (22.9%) | 0.291                    |
| <b>Number of visits to primary care and secondary care doctors (both private and public) in the last month (mean±SD)</b>      |            |            |                          |
| Baseline                                                                                                                      | 4.5±3.7    | 12.7±18.2  | <b>0.022<sup>a</sup></b> |
| 2 month                                                                                                                       | 6.9±6.3    | 7.7±9.9    | 0.779                    |
| 5 Month                                                                                                                       | 3.9±4.0    | 4.8±4.9    | 0.554                    |
| 8 Month                                                                                                                       | 4.1±3.8    | 5.0±5.6    | 0.538                    |
| <b>Hospitalization (n, %)*</b>                                                                                                |            |            |                          |
| Baseline                                                                                                                      | 5 (4.5%)   | 3 (2.9%)   | -                        |
| 2 month                                                                                                                       | 3 (2.7%)   | 3 (2.9%)   | -                        |
| 5 Month                                                                                                                       | 1 (0.9%)   | 0 (0%)     | -                        |
| 8 Month                                                                                                                       | 0 (0%)     | 0 (0%)     | -                        |
| <b>Accident and Emergency (n, %)*</b>                                                                                         |            |            |                          |
| Baseline                                                                                                                      | 1 (0.9%)   | 5 (4.8%)   | -                        |
| 2 month                                                                                                                       | 2 (1.8%)   | 4 (3.8%)   | -                        |
| 5 Month                                                                                                                       | 1 (0.9%)   | 1 (1.0%)   | -                        |
| 8 Month                                                                                                                       | 1 (0.9%)   | 2 (1.9%)   | -                        |

Abbreviations: MBCT-I, Mindfulness-based cognitive therapy for insomnia; PEEC, Psycho-education with stretching exercise control. Chi-square test and two samples t-tests were applied for analysis. \*no statistical test could be performed due to only a few cases. <sup>a</sup>  $p < 0.05$ .

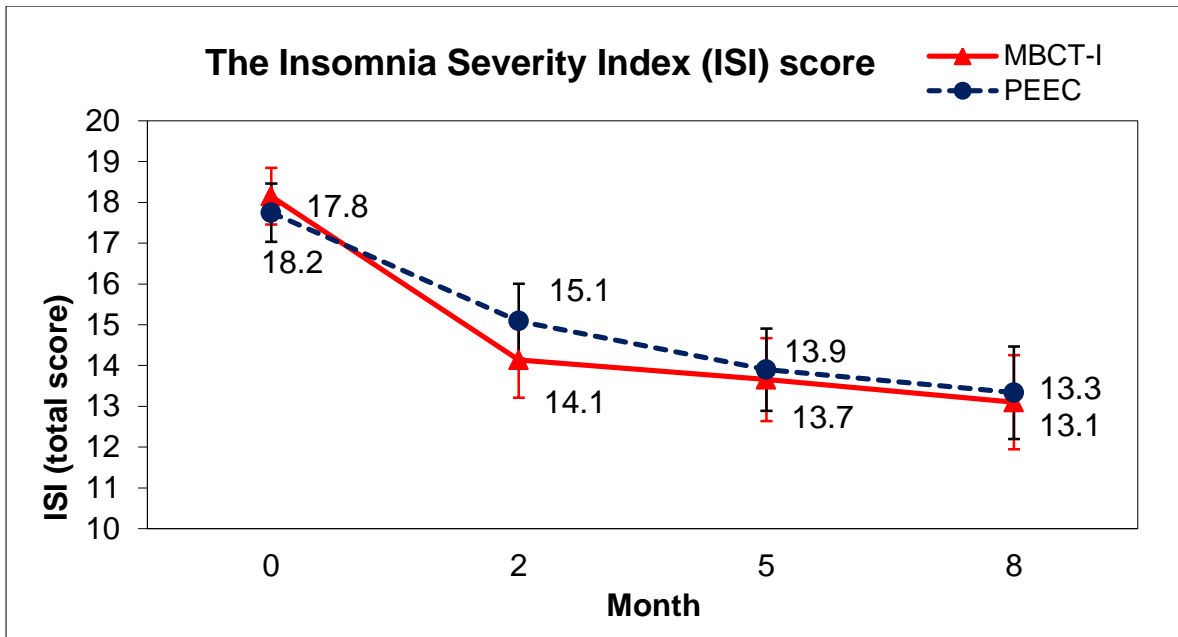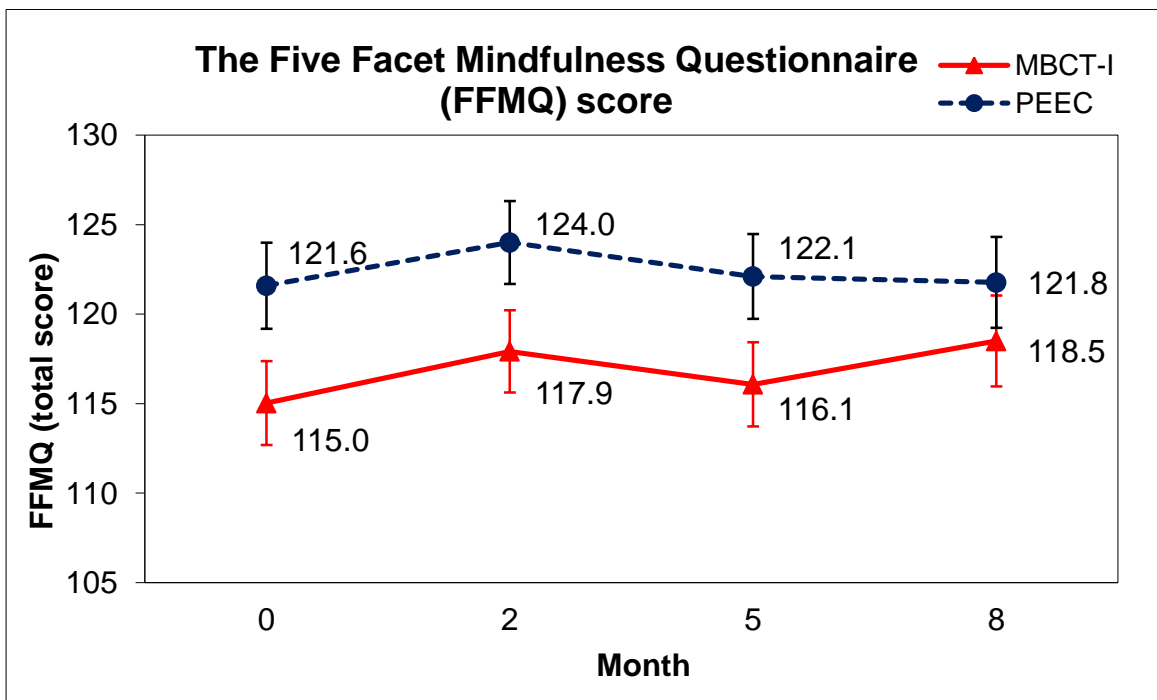

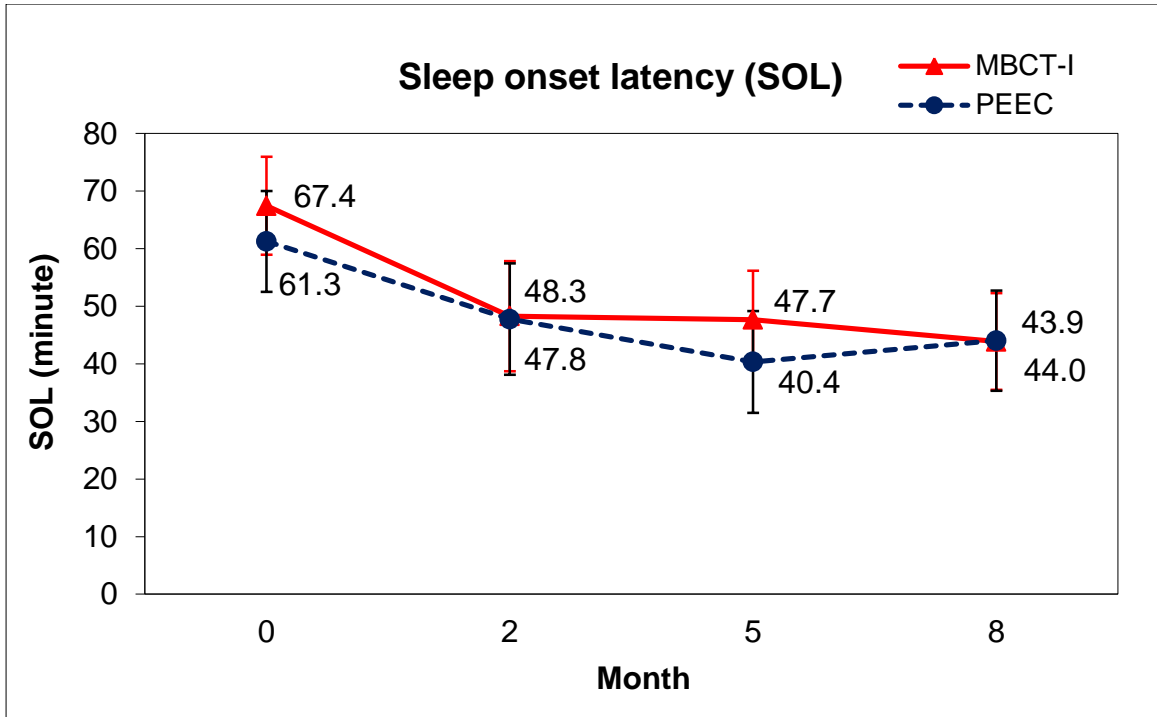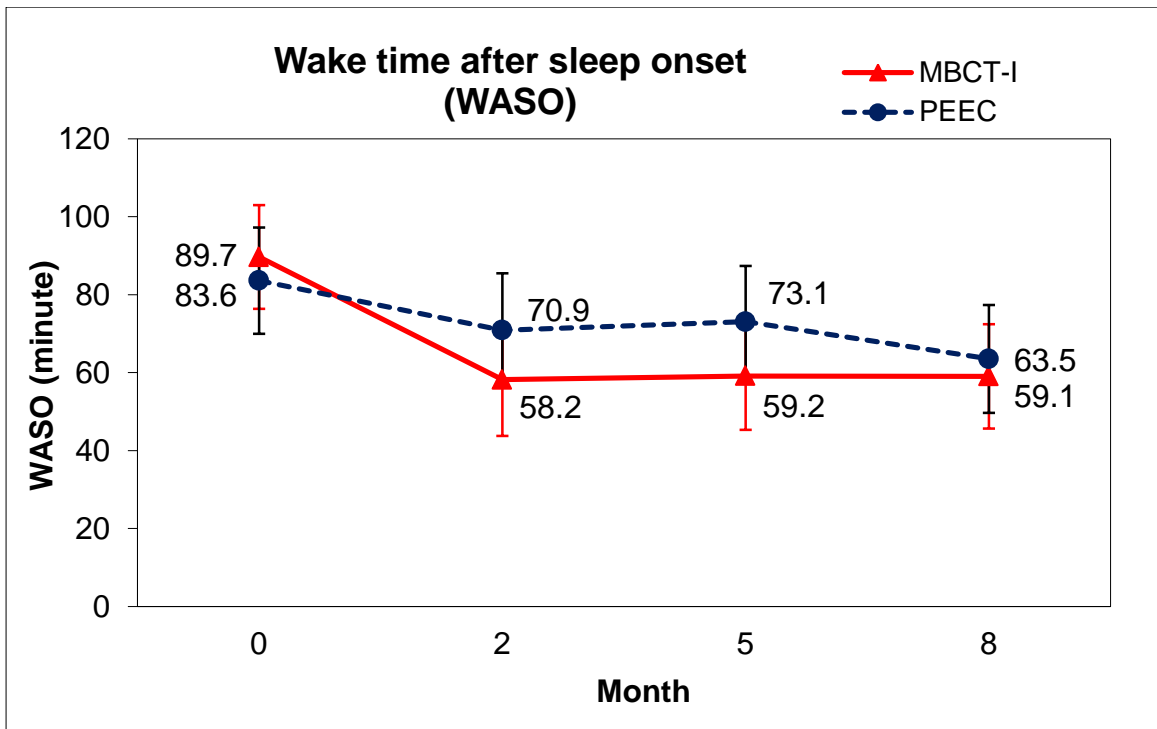

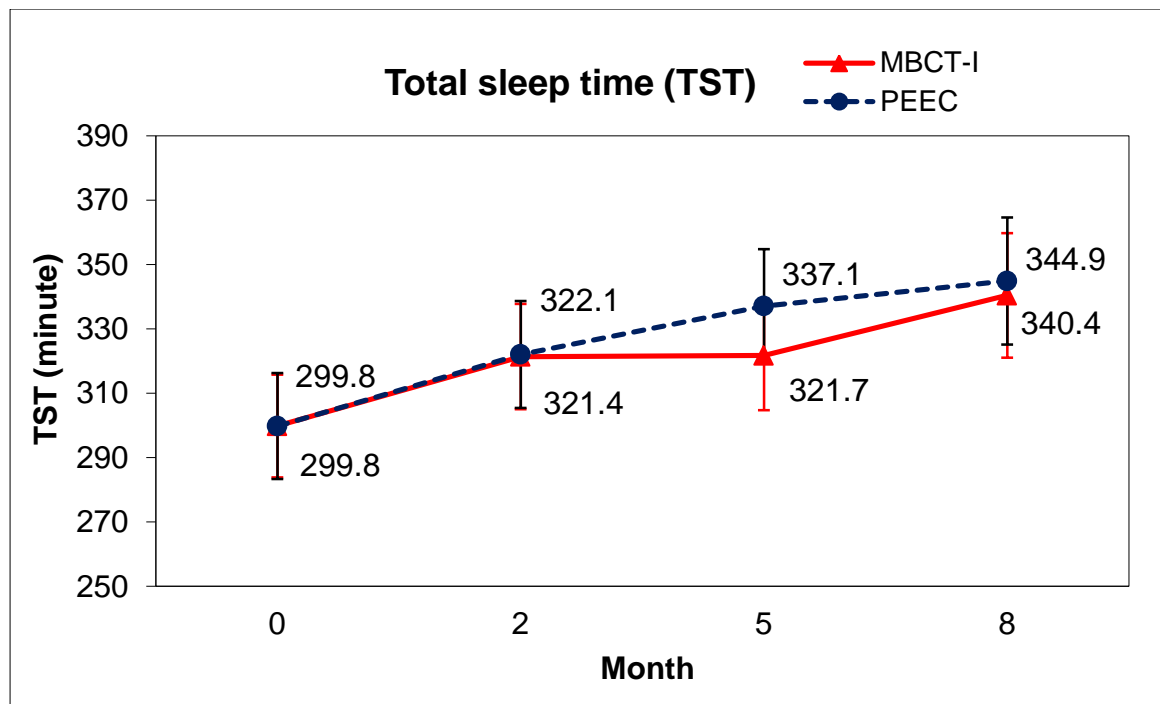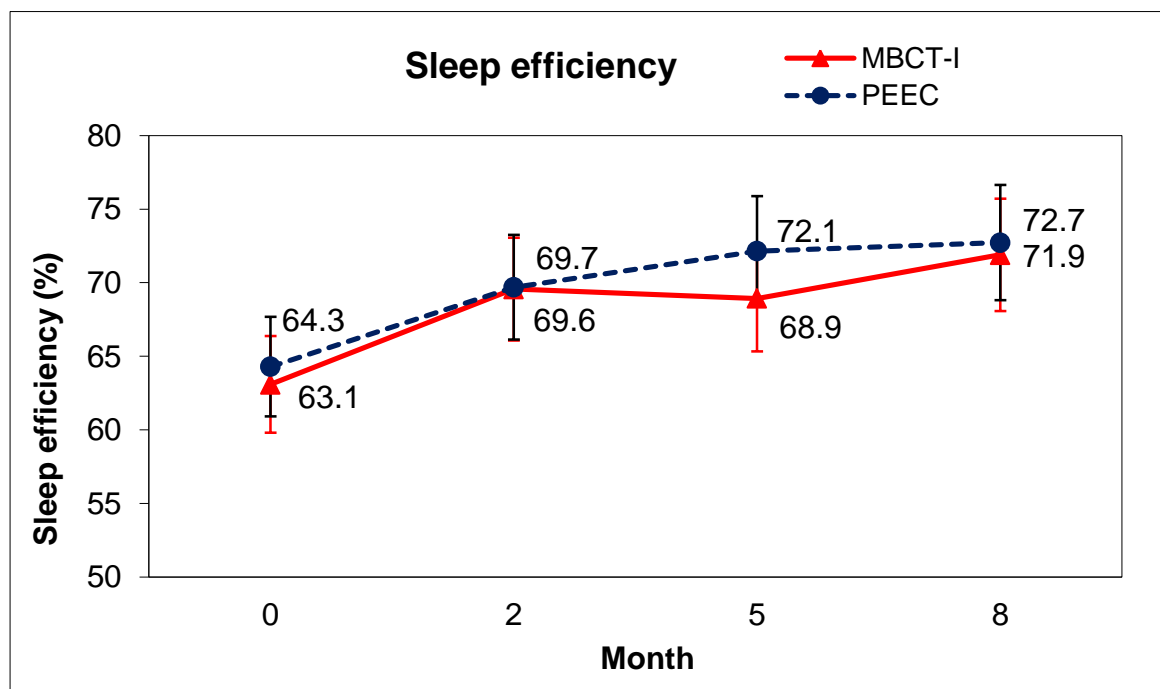

**Online supplementary figure 1: Change of results from baseline in both of the MBCT-I and PEEC groups**

Abbreviations: MBCT-I, Mindfulness-based cognitive therapy for insomnia; PEEC, Psycho-education with stretching exercise control. Data are presented as estimated mean and 95% Confidence Interval (CI) from linear mixed models. Sleep efficiency: 100% \* Ratio of sleep time (minute) to the time (minute) spent in bed.

### A. Treatment response<sup>a</sup>

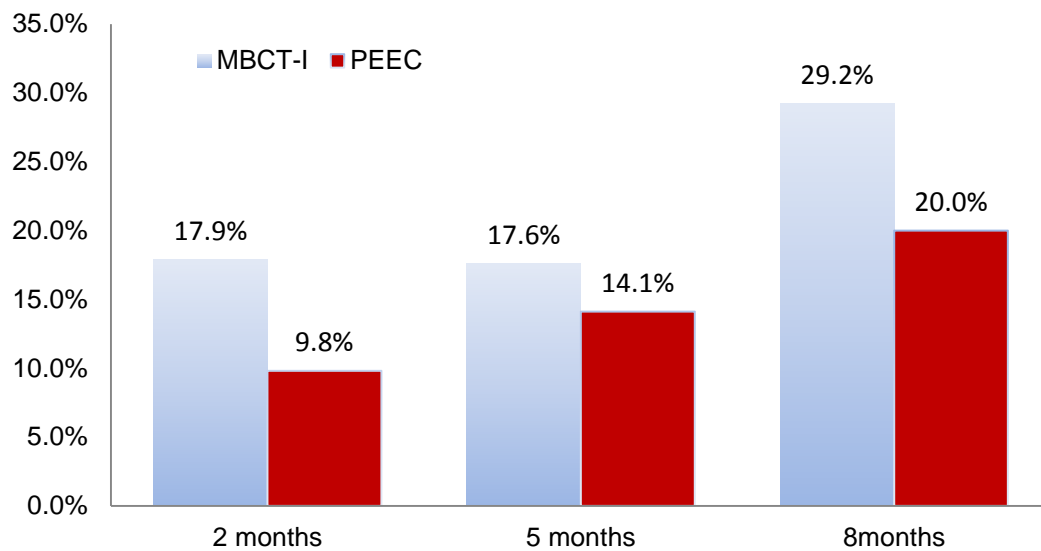

### B. Treatment remission<sup>b</sup>

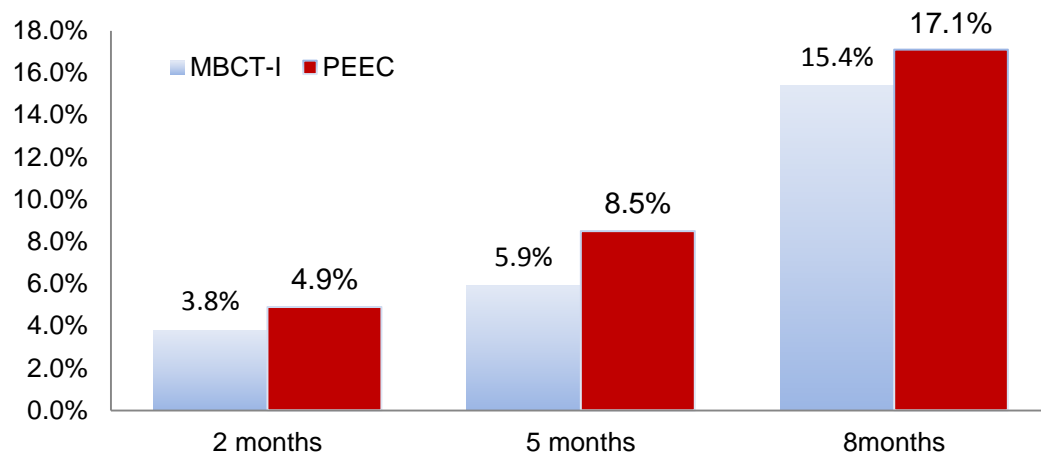

### Online supplementary figure 2: Treatment remission rate and treatment response rate

Abbreviations: MBCT-I, Mindfulness-based cognitive therapy for insomnia; PEEC, Psycho-education with stretching exercise control.

<sup>a</sup> Treatment response: Percentage of participants who met criterion for treatment response (the Insomnia Severity Index (ISI) total score reduction from baseline is more than 7 points).

<sup>b</sup> Treatment remission: Percentage of participants who met criterion for treatment remission (the ISI total score is below 8).
